# Supplementary material for: Redox-triggered reversible modulation of intense near-infrared and visible absorption using a paddlewheel-type diruthenium(iii) complex
Source: Royal Society of Chemistry journal article supplement (doi:10.1039/d1dt01681d), 2021-01-01
Supplement: d1dt01681d1.pdf [file d1dt01681d1.pdf]

*Electronic Supplementary Information*

Redox-triggered reversible modulation of intense near-infrared and visible absorption using paddlewheel-type diruthenium(III) complex

Yusuke Kataoka,<sup>\*a</sup>, Nanako Imasaki,<sup>a</sup> Natsumi Yano,<sup>b</sup> Minoru Mitsumi,<sup>c</sup> Makoto Handa<sup>a</sup>

<sup>a</sup> Department of Chemistry, Graduate School of Natural Science and Technology, Shimane University.

<sup>b</sup> Special Course in Science and Engineering, Graduate School of Natural Science and Technology, Shimane University.

<sup>c</sup> Department of Chemistry, Faculty of Science, Okayama University of Science.

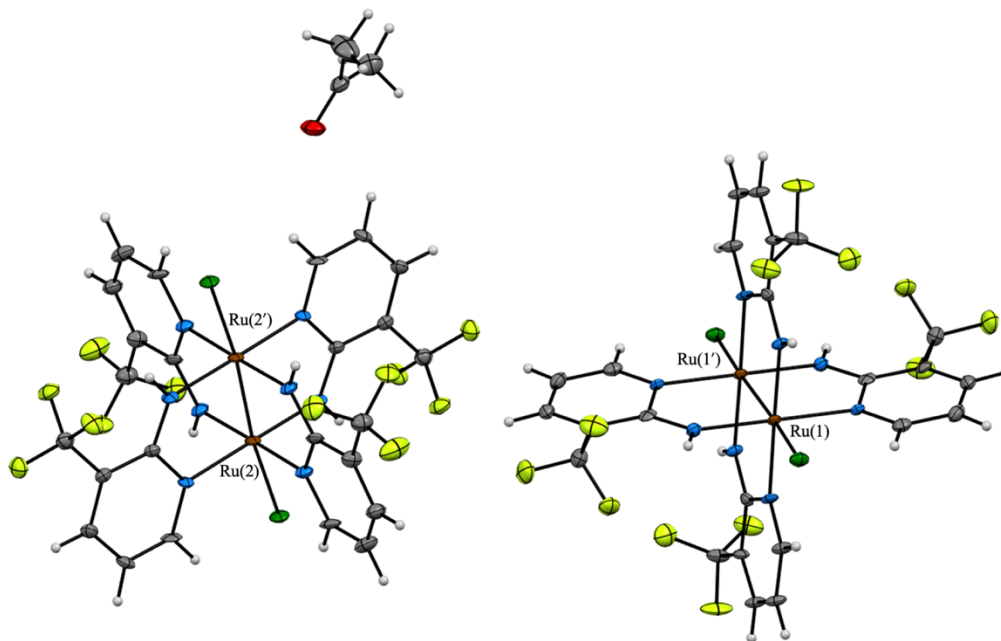

Fig. S1 Full crystal structure of [1] with thermal ellipsoids at a 30% probability (Ru: brown, Cl: green, F: yellow, O: red, N: blue, C: gray, H: white).

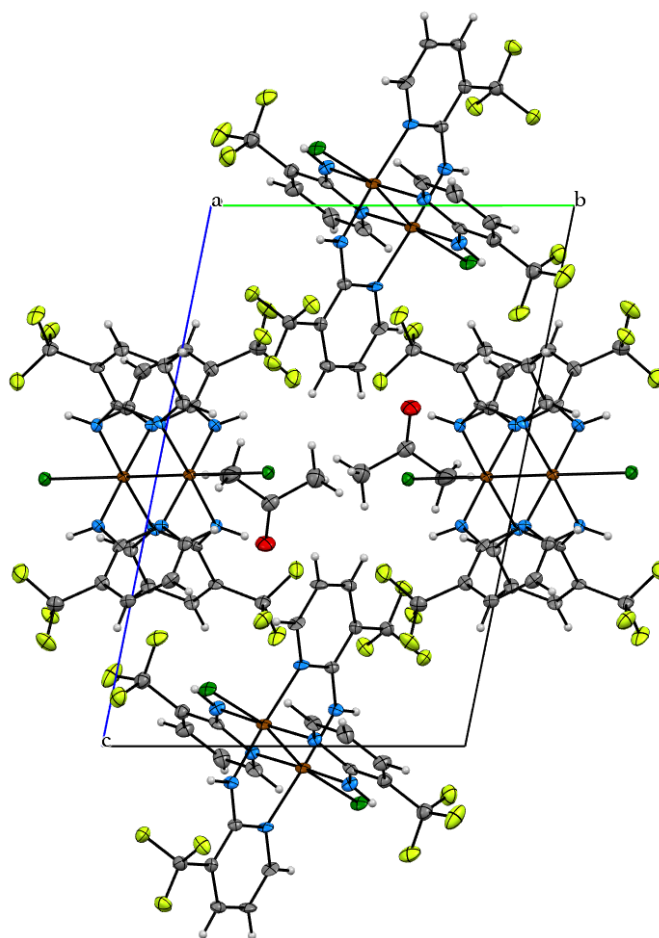

Fig. S2 Packing view of [1] along a-axis (thermal ellipsoids at a 30% probability; Ru: brown, Cl: green, F: yellow, O: red, N: blue, C: gray, H: white).

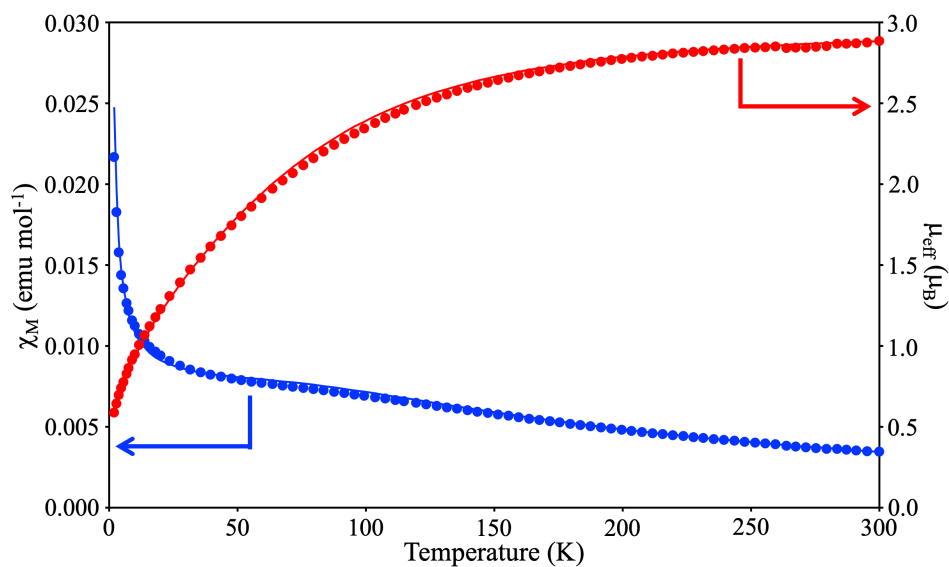

Fig. S3 Temperature dependence of magnetic susceptibility (blue dots) and effective magnetic moments (red dots) of [1]. The solid lines are drawn with the simulated values of  $g = 2.08$ ,  $D = 200 \text{ cm}^{-1}$ , and  $\rho$  (for paramagnetic impurity with  $S = 3/2$  ( $\text{Ru}_2^{5+}$ ) species). The details of the simulation are described elsewhere [ref. S2]

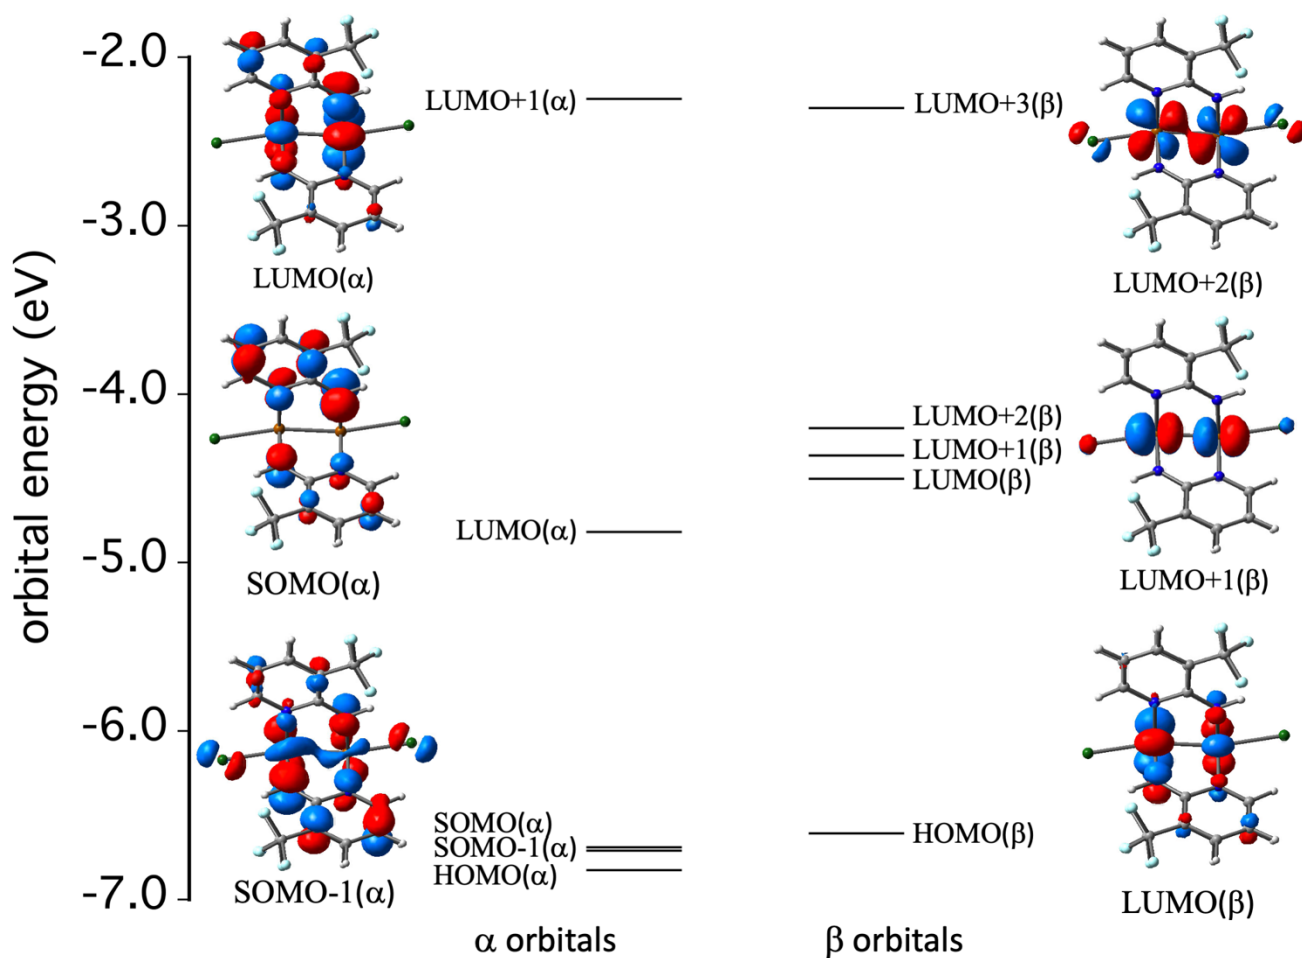

Fig. S4 Molecular orbitals of [1]. Here, the HOMO, LUMO, and SOMO are highest-occupied MO, lowest unoccupied MO, and singly occupied MO, respectively.

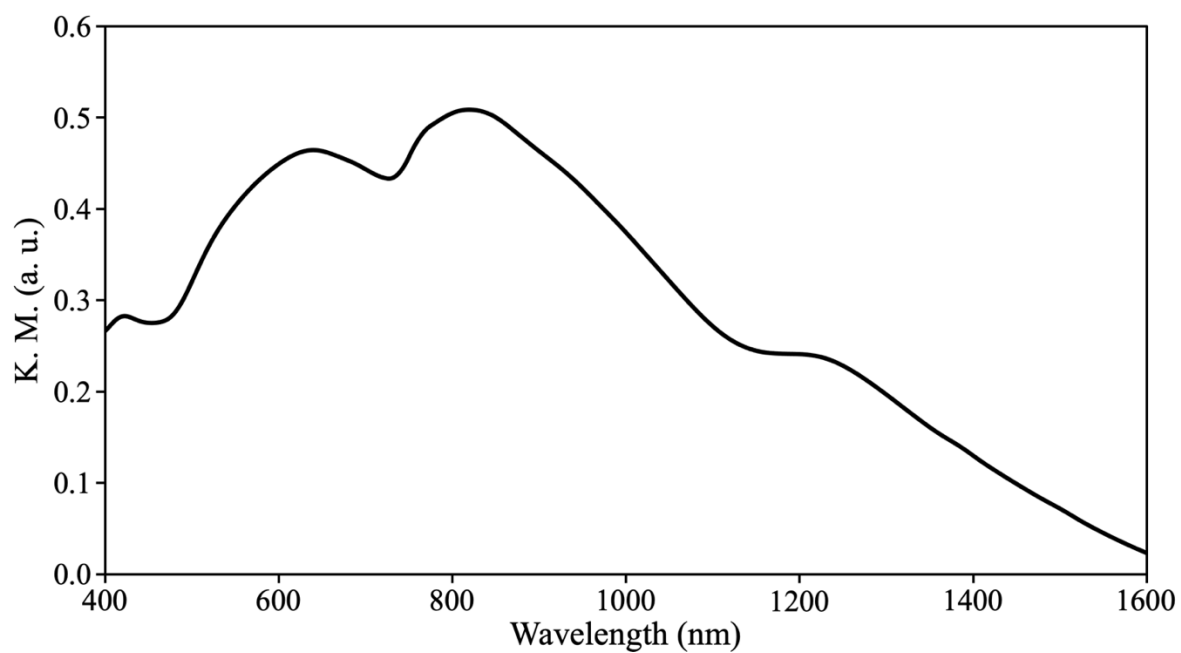

Fig. S5 Solid-state diffuse reflectance spectrum of [1].

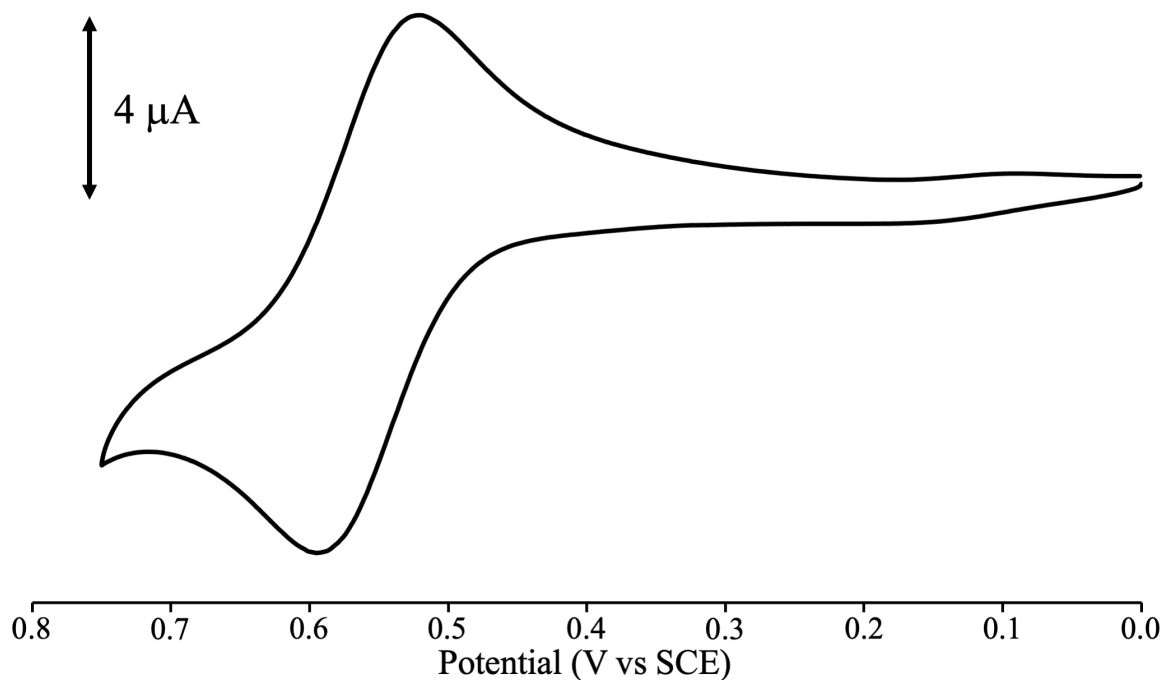

Fig. S6 CV measurement of [1] (1.0 mM) in DMF with 0.10 M  $[n\text{-Bu}_4\text{N}]\text{Cl}$  (scan rate:  $50 \text{ mVs}^{-1}$ ).

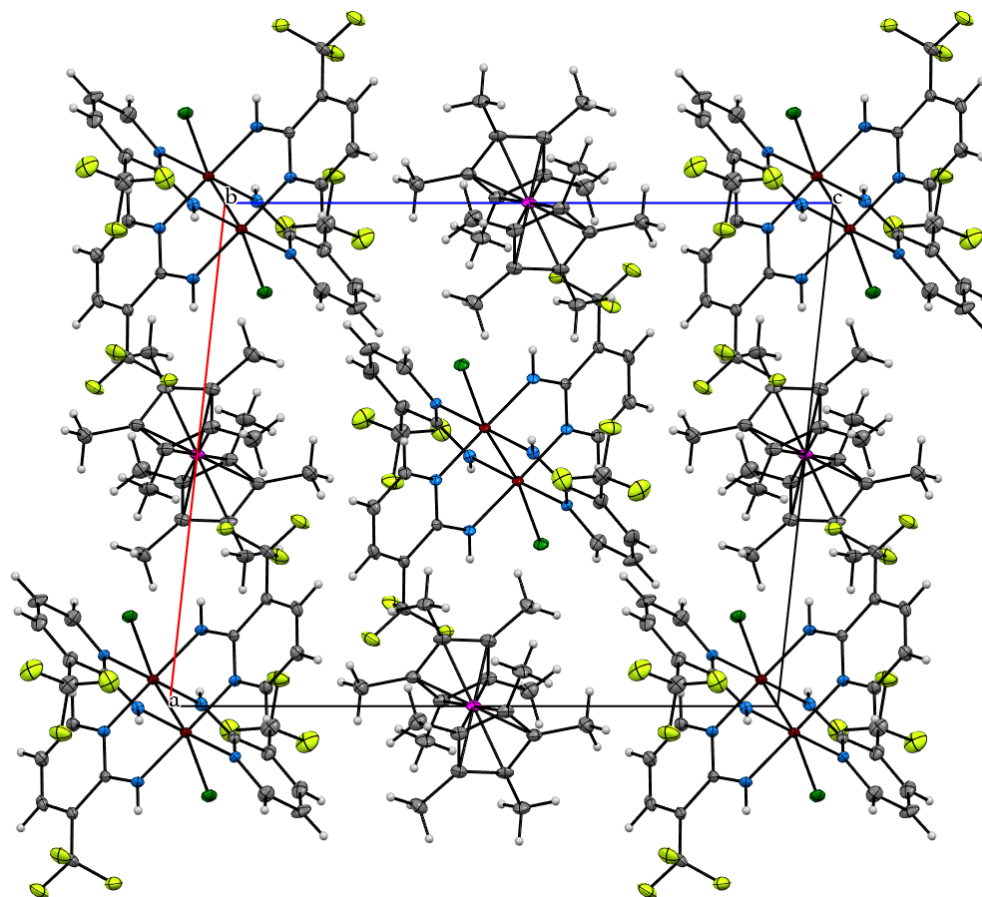

Fig. S7 Packing view of  $[\text{CoCp}^*_2][1]$  along b-axis (thermal ellipsoids at a 20% probability; Ru: brown, Cl: green, F: yellow, O: red, N: blue, C: gray, H: white).

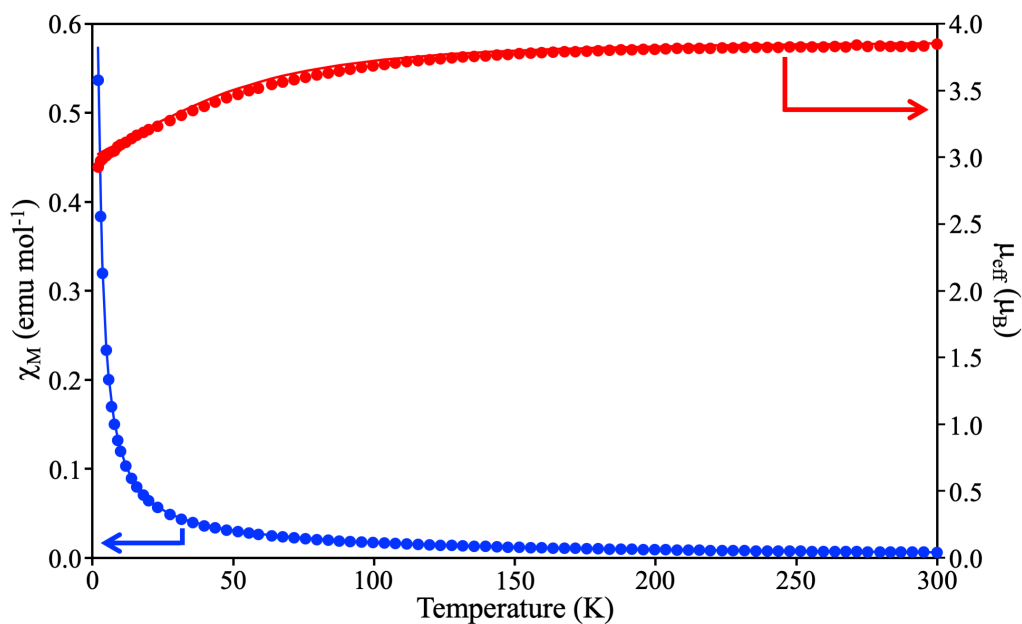

Fig. S8 Temperature dependence of magnetic susceptibility (blue dots) and effective magnetic moments (red dots) of  $[\text{CoCp}^*_2][1]$ . The solid lines are drawn with the simulated values of  $g = 2.00$  and  $D = 60 \text{ cm}^{-1}$ . The details of the simulation are described elsewhere [ref. S3].

Table S1. Crystallographic data of [1] and [CoCp\*<sub>2</sub>][1].

|                                                      | [1]                                                                                             | [CoCp* <sub>2</sub> ][1]                                                                         |
|------------------------------------------------------|-------------------------------------------------------------------------------------------------|--------------------------------------------------------------------------------------------------|
| Formula                                              | C <sub>27</sub> H <sub>22</sub> Cl <sub>2</sub> F <sub>12</sub> N <sub>8</sub> ORu <sub>2</sub> | C <sub>44</sub> H <sub>46</sub> Cl <sub>2</sub> CoF <sub>12</sub> N <sub>8</sub> Ru <sub>2</sub> |
| <i>M<sub>r</sub></i> (g mol <sup>-1</sup> )          | 975.56                                                                                          | 1246.86                                                                                          |
| Crystal system                                       | triclinic                                                                                       | monoclinic                                                                                       |
| Space group                                          | <i>P</i> -1                                                                                     | <i>P</i> 2 <sub>1</sub> / <i>n</i>                                                               |
| <i>a</i> (Å)                                         | 10.661(5)                                                                                       | 14.0204(5)                                                                                       |
| <i>b</i> (Å)                                         | 11.254(6)                                                                                       | 10.3722(4)                                                                                       |
| <i>c</i> (Å)                                         | 15.836(7)                                                                                       | 16.8406(6)                                                                                       |
| <i>α</i> (deg)                                       | 100.225(5)                                                                                      | 90                                                                                               |
| <i>β</i> (deg)                                       | 90.827(6)                                                                                       | 96.297(3)                                                                                        |
| <i>γ</i> (deg)                                       | 112.350(6)                                                                                      | 90                                                                                               |
| <i>V</i> (Å <sup>3</sup> )                           | 1722.3(14)                                                                                      | 2434.22(16)                                                                                      |
| <i>Z</i>                                             | 2                                                                                               | 2                                                                                                |
| <i>D</i> <sub>calc</sub> (g cm <sup>-3</sup> )       | 1.881                                                                                           | 1.701                                                                                            |
| <i>μ</i> (mm <sup>-1</sup> )                         | 1.134                                                                                           | 1.147                                                                                            |
| <i>F</i> (000)                                       | 956                                                                                             | 1246                                                                                             |
| <i>R</i> <sub>1</sub> ( <i>I</i> > 2σ( <i>I</i> ))   | 0.0605                                                                                          | 0.0799                                                                                           |
| w <i>R</i> <sub>2</sub> ( <i>I</i> > 2σ( <i>I</i> )) | 0.1380                                                                                          | 0.1883                                                                                           |
| <i>R</i> <sub>1</sub> (all data)                     | 0.0788                                                                                          | 0.0840                                                                                           |
| w <i>R</i> <sub>2</sub> (all data)                   | 0.1574                                                                                          | 0.1898                                                                                           |
| GOF on <i>F</i> <sup>2</sup>                         | 0.973                                                                                           | 1.358                                                                                            |

Table S2. Selected structural parameters (length: Å, angle: °) of crystal structure of [1].

| Bond lengths (Å)   |            |                    |            |
|--------------------|------------|--------------------|------------|
| Ru(1)-Ru(1')       | 2.3296(15) | Ru(2)-N(2')        | 2.3307(12) |
| Ru(1)-Cl(1)        | 2.510(2)   | Ru(2)-Cl(2)        | 2.5186(19) |
| Ru(1)-N(1')        | 2.094(5)   | Ru(2)-N(5')        | 2.066(6)   |
| Ru(1)-N(2)         | 2.011(5)   | Ru(2)-N(6)         | 1.973(6)   |
| Ru(1)-N(3')        | 2.081(6)   | Ru(2)-N(7')        | 2.069(6)   |
| Ru(1)-N(4)         | 1.995(6)   | Ru(2)-N(8)         | 2.007(6)   |
| C(1)-N(1)          | 1.375(8)   | C(13)-N(5)         | 1.381(9)   |
| C(1)-N(2)          | 1.301(8)   | C(13)-N(6)         | 1.338(8)   |
| C(7)-N(3)          | 1.374(9)   | C(19)-N(7)         | 1.371(9)   |
| C(7)-N(4)          | 1.327(9)   | C(19)-N(8)         | 1.337(8)   |
| Bond angle (°)     |            |                    |            |
| Ru(1')-Ru(1)-Cl(1) | 170.44(5)  | Ru(2')-Ru(2)-Cl(2) | 167.81(6)  |
| N(1')-Ru(1)-Ru(1') | 90.62(14)  | N(5')-Ru(2)-Ru(2') | 92.38(14)  |
| N(2)-Ru(1)-Ru(1')  | 88.04(15)  | N(6)-Ru(2)-Ru(2')  | 86.38(15)  |
| N(3')-Ru(1)-Ru(1') | 90.85(14)  | N(7')-Ru(2)-Ru(2') | 91.26(15)  |
| N(4)-Ru(1)-Ru(1')  | 87.83(16)  | N(8)-Ru(2)-Ru(2')  | 87.27(15)  |
| N(1')-Ru(1)-N(3')  | 90.5(2)    | N(5')-Ru(2)-N(7')  | 87.5(2)    |
| N(1')-Ru(1)-N(4)   | 88.9(2)    | N(5')-Ru(2)-N(8)   | 90.1(3)    |
| N(2)-Ru(1)-N(4)    | 92.5(2)    | N(6)-Ru(2)-N(8)    | 92.4(3)    |
| N(2)-Ru(1)-N(3')   | 88.0(2)    | N(6)-Ru(2)-N(7')   | 89.9(3)    |

Table S3. Result of TDDFT calculation of [1]. Here, H, L, and S are HOMO, LUMO, and SOMO, respectively.

| Wavelength (nm) | Oscillator Strength | Excitation characters                                                                                                                                                                                                                                                                                                                                                                                                                                                                                                                                                                                                                                                                                               | Observed absorption bands (nm) |
|-----------------|---------------------|---------------------------------------------------------------------------------------------------------------------------------------------------------------------------------------------------------------------------------------------------------------------------------------------------------------------------------------------------------------------------------------------------------------------------------------------------------------------------------------------------------------------------------------------------------------------------------------------------------------------------------------------------------------------------------------------------------------------|--------------------------------|
| 1301.8          | 0.0068              | S( $\alpha$ )[ $\pi$ (amt fmp)] $\rightarrow$ L( $\alpha$ )[ $\delta^*$ (Ru <sub>2</sub> )] (67%)<br>H-1( $\beta$ )[ $\pi$ (amt fmp)] $\rightarrow$ L( $\beta$ )[ $\delta^*$ (Ru <sub>2</sub> )] (24%)                                                                                                                                                                                                                                                                                                                                                                                                                                                                                                              | 1350-1160                      |
| 998.3           | 0.0067              | H-1( $\alpha$ )[ $\pi$ (amt fmp)] $\rightarrow$ L( $\alpha$ )[ $\delta^*$ (Ru <sub>2</sub> )] (58%)<br>H-2( $\beta$ )[ $\pi$ (amt fmp)] $\rightarrow$ L( $\beta$ )[ $\delta^*$ (Ru <sub>2</sub> )] (19%)<br>H-1( $\beta$ )[ $\pi$ (amt fmp)] $\rightarrow$ L( $\beta$ )[ $\delta^*$ (Ru <sub>2</sub> )] (11%)                                                                                                                                                                                                                                                                                                                                                                                                       | 880                            |
| 987.8           | 0.0123              | H-4( $\beta$ )[ $\pi$ (Ru <sub>2</sub> )] $\rightarrow$ L+1( $\beta$ )[ $\pi^*$ (Ru <sub>2</sub> )] (31%),<br>H( $\beta$ )[ $\delta$ (Ru <sub>2</sub> )/ $\pi$ (amt fmp)] $\rightarrow$ L( $\beta$ )[ $\delta^*$ (Ru <sub>2</sub> )] (19%),<br>H-3( $\beta$ )[ $\sigma$ (Ru <sub>2</sub> )] $\rightarrow$ L+1( $\beta$ )[ $\pi^*$ (Ru <sub>2</sub> )] (13%),<br>H-1( $\beta$ )[ $\pi$ (amt fmp)] $\rightarrow$ L+1( $\beta$ )[ $\pi^*$ (Ru <sub>2</sub> )] (15%)<br>H-1( $\alpha$ )[ $\pi$ (amt fmp)] $\rightarrow$ L( $\alpha$ )[ $\delta^*$ (Ru <sub>2</sub> )] (9%)                                                                                                                                              |                                |
| 923.7           | 0.0066              | H-3( $\alpha$ )[ $\sigma$ (Ru <sub>2</sub> )] $\rightarrow$ L( $\alpha$ )[ $\delta^*$ (Ru <sub>2</sub> )] (31%)<br>H-3( $\beta$ )[ $\sigma$ (Ru <sub>2</sub> )] $\rightarrow$ L( $\beta$ )[ $\delta^*$ (Ru <sub>2</sub> )] (41%)<br>H( $\beta$ )[ $\delta$ (Ru <sub>2</sub> )/ $\pi$ (amt fmp)] $\rightarrow$ L( $\beta$ )[ $\delta^*$ (Ru <sub>2</sub> )] (9%)                                                                                                                                                                                                                                                                                                                                                     |                                |
| 900.2           | 0.0139              | H-3( $\beta$ )[ $\sigma$ (Ru <sub>2</sub> )] $\rightarrow$ L+2( $\beta$ )[ $\pi^*$ (Ru <sub>2</sub> )] (24%)<br>H-3( $\alpha$ )[ $\sigma$ (Ru <sub>2</sub> )] $\rightarrow$ L( $\alpha$ )[ $\delta^*$ (Ru <sub>2</sub> )] (23%),<br>S-1( $\alpha$ )[ $d$ (Ru <sub>2</sub> )/ $\pi$ (amt fmp)] $\rightarrow$ L( $\alpha$ )[ $\delta^*$ (Ru <sub>2</sub> )] (12%),<br>H-5( $\beta$ )[ $\pi$ (Ru <sub>2</sub> )] $\rightarrow$ L+2( $\beta$ )[ $\pi^*$ (Ru <sub>2</sub> )] (10%),<br>H-1( $\beta$ )[ $\pi$ (amt fmp)] $\rightarrow$ L+1( $\beta$ )[ $\pi^*$ (Ru <sub>2</sub> )] (10%),<br>H( $\beta$ )[ $\delta$ (Ru <sub>2</sub> )/ $\pi$ (amt fmp)] $\rightarrow$ L( $\beta$ )[ $\delta^*$ (Ru <sub>2</sub> )] (12%) |                                |
| 863.8           | 0.0023              | H-3( $\beta$ )[ $\sigma$ (Ru <sub>2</sub> )] $\rightarrow$ L+2( $\beta$ )[ $\pi^*$ (Ru <sub>2</sub> )] (68%)<br>H-1( $\beta$ )[ $d$ (Ru <sub>2</sub> )/ $\pi$ (amt fmp)] $\rightarrow$ L+1( $\beta$ )[ $\pi^*$ (Ru <sub>2</sub> )] (15%)                                                                                                                                                                                                                                                                                                                                                                                                                                                                            |                                |
| 630.3           | 0.1402              | H-2( $\beta$ )[ $\pi$ (amt fmp)] $\rightarrow$ L( $\beta$ )[ $\delta^*$ (Ru <sub>2</sub> )] (70%) ,<br>S-1( $\alpha$ )[ $d$ (Ru <sub>2</sub> )/ $\pi$ (amt fmp)] $\rightarrow$ L( $\alpha$ )[ $\delta^*$ (Ru <sub>2</sub> )] (20%)                                                                                                                                                                                                                                                                                                                                                                                                                                                                                  | 672                            |
| 622.8           | 0.0079              | H-2( $\beta$ )[ $\pi$ (amt fmp)] $\rightarrow$ L+2( $\beta$ )[ $\pi^*$ (Ru <sub>2</sub> )] (70%)                                                                                                                                                                                                                                                                                                                                                                                                                                                                                                                                                                                                                    |                                |



Table S4. Selected structural parameters (length: Å, angle: °) of crystal structure of [CoCp\*<sub>2</sub>][1].

| Bond lengths (Å)   |            |                   |           |
|--------------------|------------|-------------------|-----------|
| Ru(1)-Ru(1')       | 2.3066(16) | Ru(1)-Cl(1)       | 2.539(3)  |
| Ru(1)-N(1')        | 2.091(8)   | C(1)-N(1)         | 1.375(12) |
| Ru(1)-N(2)         | 2.025(8)   | C(1)-N(2)         | 1.313(13) |
| Ru(1)-N(3')        | 2.076(9)   | C(7)-N(3)         | 1.372(14) |
| Ru(1)-N(4)         | 2.031(8)   | C(7)-N(4)         | 1.320(13) |
| Bond angle (°)     |            |                   |           |
| Ru(1')-Ru(1)-Cl(1) | 171.38(8)  | N(1')-Ru(1)-N(3') | 90.8(3)   |
| N(1')-Ru(1)-Ru(1') | 91.6(2)    | N(1')-Ru(1)-N(4)  | 88.8(3)   |
| N(2)-Ru(1)-Ru(1')  | 87.6(2)    | N(2)-Ru(1)-N(4)   | 90.6(3)   |
| N(3')-Ru(1)-Ru(1') | 90.9(2)    | N(2)-Ru(1)-N(3')  | 89.8(3)   |
| N(4)-Ru(1)-Ru(1')  | 88.5(2)    |                   |           |
